# Supplementary material
Source: publisher figshare collection journal article supplement (https://karger.figshare.com/ndownloader/files/28969233)
Supplement: Supplementary file 1 [file 28969233]

***Supplement***

**Supplementary figure 1. Effect of NFκB1 deficiency on lung inflammatory parameters and inflammatory cell subsets in a mouse model of allergic airway inflammation.** Mice were challenged with saline or house dust mite (HDM) 3 days/week for 3 weeks. Lavage of the lungs was performed using PBS 72h after the final HDM challenge. Cytospins were stained with May-Grünwald/Giemsa and cells were counted and classified as macrophages, eosinophils, neutrophils or lymphocytes. Data is presented as median with interquartile range. Comparison of different groups was performed using Kruskal-Wallis with Wilcoxon post-testing. *: p < 0.05; **: p < 0.01. Data from 5-6 mice per group was used for analysis.

**Supplementary figure 2. Effect of NFκB1 deficiency on lung inflammatory parameters and inflammatory cell subsets in a mouse model of asthma exacerbation.** Mice were challenged with saline or house dust mite (HDM) 3 days/week for 3 weeks and were then stimulated with dsRNA (poly(I:C)) for 3 days. Lavage of the lungs was performed using PBS 24h after the final poly(I:C) exposure. Cytospins were stained with May-Grünwald/Giemsa and cells were counted and classified as macrophages, eosinophils, neutrophils or lymphocytes. Data is presented as median with interquartile range. Comparison of different groups was performed using Kruskal-Wallis with Wilcoxon post-testing. *: p < 0.05; **: p < 0.01; ***: p < 0.001. Data from 5-12 mice per group was used for analysis.

**Supplementary figure 3. Effect of NFκB1 deficiency on IL-33 expression at exacerbation.** Mice were challenged with saline or house dust mite (HDM) 3 days/week for 3 weeks and were then stimulated with dsRNA (poly(I:C)) for 3 days. IL-33 gene **(A)** and protein expression **(B)** was measured in lung homogenates. IL-33 positive cells were quantified in the airways **(C)** and parenchyma **(D)** using immunohistochemistry. Data is presented as median with interquartile range. Comparison of different groups was performed using Kruskal-Wallis with Wilcoxon post-testing. *: p < 0.05; **: p < 0.01. Data from 5-12 mice per group was used for analysis. A representative image of lung IL-33 immunostaining. Scale bars = 100 μm.
